# Supplementary material for: A realistic perspective for CO2triggered tuning of electrical conductivity
Source: Royal Society of Chemistry journal article supplement (doi:10.1039/d2ra05511b), 2022-01-01
Supplement: d2ra05511b1.pdf [file d2ra05511b1.pdf]

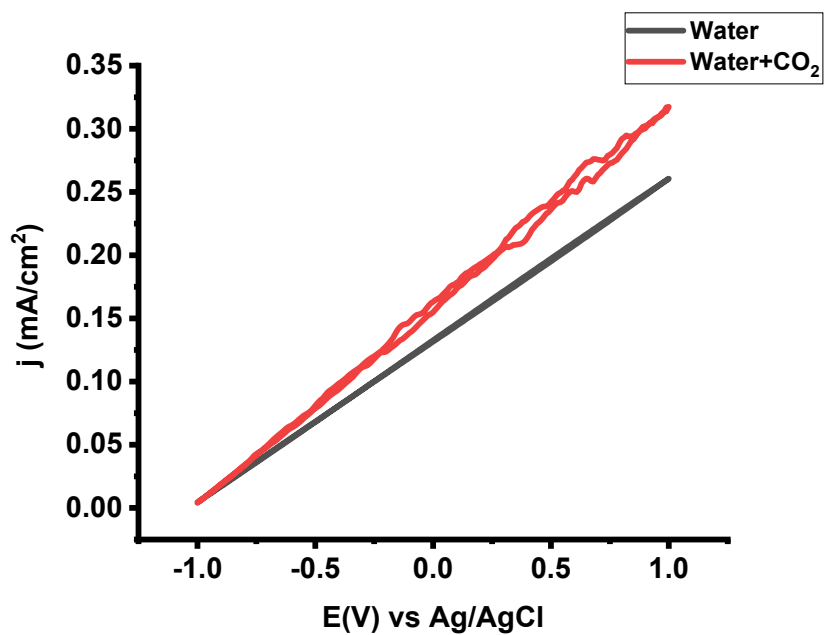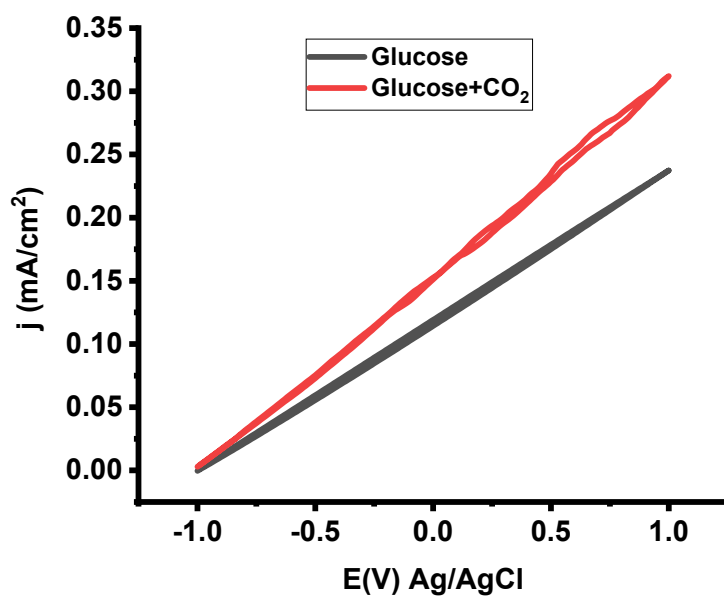

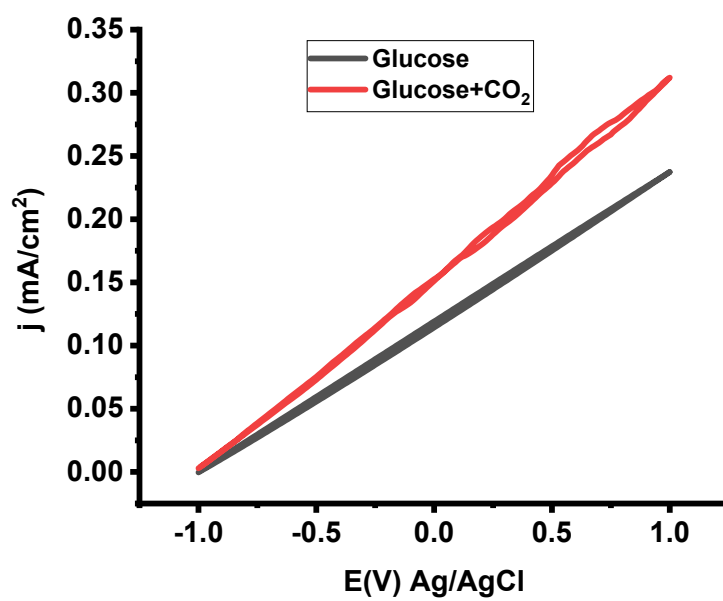

Supplementary Figure 1; Electrolysis using different electrolytes

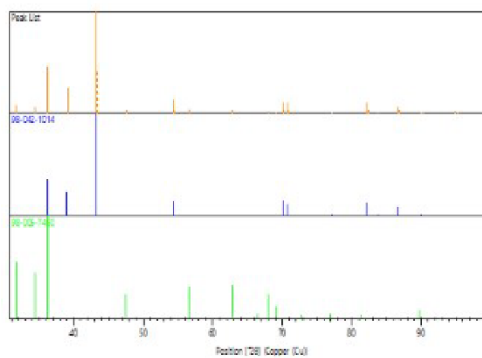

Supplementary Figure 2; XRD results
